# Supplementary material for: Highly porous Fe/N/C catalyst for oxygen reduction: the importance of pores
Source: Royal Society of Chemistry journal article supplement (doi:10.1039/d1cc02047a), 2021-01-01
Supplement: d1cc02047a1.pdf [file d1cc02047a1.pdf]

## Highly Porous Fe/N/C Catalyst for Oxygen Reduction: The Importance of Pores

### Experimental Section

#### Synthesis of g-C<sub>3</sub>N<sub>4</sub>

Urea loaded in a covered corundum crucible was heated in a muffle furnace to desired temperature (525, 550, 575 and 600) with a heating rate of 5 °C min<sup>-1</sup> and kept at that temperature for 4 h. The obtained g-C<sub>3</sub>N<sub>4</sub> sample was denoted as g-C<sub>3</sub>N<sub>4</sub>-T (T represents pyrolysis temperature).

#### Synthesis of Fe/N/C

0.5 g of g-C<sub>3</sub>N<sub>4</sub>, 2 g of glucose and 30 mg of FeCl<sub>3</sub>·6H<sub>2</sub>O were added to 40 mL of H<sub>2</sub>O, and the resultant suspension was ultrasonicated for 4 h and then transferred to a 50-mL Teflon-lined autoclave, which was then placed in a convection oven and kept at 160 °C for 10 h. The resultant product was centrifuged and washed alternately with ethanol and deionized water, and after three-time centrifugation-washing cycles the obtained sample was dried at 80 °C overnight and then transferred to a covered corundum boat placed in a quartz tube furnace, which was heated to 1100 °C with a heating rate of 5 °C min<sup>-1</sup> and kept at that temperature for 1 h under flowing N<sub>2</sub>. The finally obtained sample was denoted as Fe/N/C-T (T represents the pyrolysis temperature of g-C<sub>3</sub>N<sub>4</sub> obtained).

#### Material characterization

The morphology, structure and composition of the synthesized materials were characterized by transmission electron microscopy (TEM, JEM-2100, JEOL), high-resolution TEM (HRTEM, Titan Themis 200, FEI) equipped with energy-dispersive X-ray spectrometry (EDS, Super-X, Bruker), X-ray diffraction (XRD, D8 Advance, Bruker), X-ray photoelectron spectroscopy (XPS, VG Multilab 2000, Bruker), surface area and porosity analyzer (ASAP2460, Micromeritics), Inductively coupled plasma mass spectrometry (ICP-

MS, 7700, Agilent Technology) and laser confocal micro-Raman spectroscopy (DXR, American Thermo Electron).

### Electrochemical characterization

Electrochemical measurements were carried out by using an electrochemical workstation (PGSTAT 302 N, Metrohm Autolab) in a three-electrode system consisting of a graphite rod counter electrode, a Hg/HgO reference electrode, and a catalyst-modified glassy-carbon (GC) working electrode (3 mm in diameter). All the electrode potentials reported in this work were reported with respect to reversible hydrogen electrode (RHE). The loading of Fe/N/C sample on the GC electrode was  $397 \mu\text{g}\cdot\text{cm}^{-2}$  and the loading of the commercial Pt/C (20 wt. %, Johnson Matthey) catalyst on GC electrode was  $132 \mu\text{g}\cdot\text{cm}^{-2}$ . The electrolyte was 0.1 M KOH solution, and its temperature was maintained at 25 °C with circulating ethylene glycol/water. The ORR performance of the catalyst was measured in O<sub>2</sub>-saturated 0.1 M KOH solution by linear sweep voltammetry (LSV) with a sweep rate of 10 mV s<sup>-1</sup> at 1600 rpm. Rotating ring-disk electrode (RRDE, Pine) was used to determine the HO<sub>2</sub><sup>-</sup> yield and the electron transfer number (*n*) with the Pt ring potential set to 1.2 V vs. RHE. The HO<sub>2</sub><sup>-</sup> yield and the electron transfer number during the ORR process were determined based on the following equations <sup>1</sup>,

$$\text{HO}_2^-(\%) = 200 \frac{I_r / N}{I_d + I_r / N} \quad (1)$$

$$n = 4 \frac{I_d}{I_d + I_r / N} \quad (2)$$

where *I<sub>r</sub>* is the ring current, *I<sub>d</sub>* is the disk current, and N is the collecting efficiency of Pt ring (0.37).

### DFT calculation

Cambridge Sequential Total Energy Package (CASTEP) code was used for DFT calculations. The

valence-core interaction was described by using a ultrasoft pseudopotential approach and an energy cutoff of 600 eV was used for plane-wave expansion. The exchange-correlation functional was described by Perdew-Burke-Ernzerhof (PBE) functional with the generalized gradient approximation (GGA). The single-layer g-C<sub>3</sub>N<sub>4</sub> (001) slab was constructed with a 2 × 2 supercell, two-layer Pt (111) slabs were constructed, and a single-layer Fe/N/C slab was constructed with an 8 × 6 supercell, all with a vacuum region of 15 Å to avoid interaction between slabs. The convergence criteria for energy and force were set as 0.00001 eV and 0.01 eV/Å, respectively. The energy difference between the g-C<sub>3</sub>N<sub>4</sub>-coordinated Fe system and the corresponding isolated systems, were calculated based on Equation 3,

$$\Delta E_{\text{adsorption}} = E_{\text{Fe/g-C}_3\text{N}_4} - E_{\text{Fe}} - E_{\text{g-C}_3\text{N}_4} \quad (3)$$

where  $\Delta E_{\text{adsorption}}$  was the adsorption energy of Fe<sup>3+</sup> ion or Fe atom at the “nitrogen pot” of g-C<sub>3</sub>N<sub>4</sub>, and  $E_{\text{Fe/g-C}_3\text{N}_4}$ ,  $E_{\text{Fe}}$  and  $E_{\text{g-C}_3\text{N}_4}$  were the total energies of the g-C<sub>3</sub>N<sub>4</sub>-coordinated Fe system, single Fe<sup>3+</sup> ion or Fe atom, and bare g-C<sub>3</sub>N<sub>4</sub>, respectively.

The Gibbs free energy change ( $\Delta G$ ) corresponding to each reaction was determined through  $\Delta G = \Delta E + \Delta \text{ZPE} - T\Delta S$ , where  $\Delta E$ ,  $\Delta \text{ZPE}$  and  $\Delta S$  were the changes in energy, in zero-point energies, and in entropy, respectively, and  $T$  was the temperature (298.15 K). The Gibbs free energy of H<sub>2</sub>O(l) was calculated from the ideal gas of H<sub>2</sub>O(g) by  $G_{\text{H}_2\text{O(l)}} = G_{\text{H}_2\text{O(g)}} + RT \ln(p/p_0)$ , where  $R$  was the ideal gas constant,  $T$  was 298.15 K, and  $P$  and  $P_0$  were 0.035 and 1 bar, respectively. The Gibbs free energy of O<sub>2</sub> was derived as  $G_{\text{O}_2} = 2G_{\text{H}_2\text{O(l)}} - 2G_{\text{H}_2} + 4.92$  and that of OH<sup>-</sup> was derived as  $G_{\text{OH}^-} = G_{\text{H}_2\text{O(l)}} - G_{\text{H}^+} = G_{\text{H}_2\text{O(l)}} - 1/2G_{\text{H}_2}$ . The electrode potential effect on  $G$  was adjusted by shifting the

$G$  at zero potential by  $neU$ , where  $U$  and  $n$  were the electrode potential vs. RHE and the number of electrons transferred, respectively <sup>3</sup>.

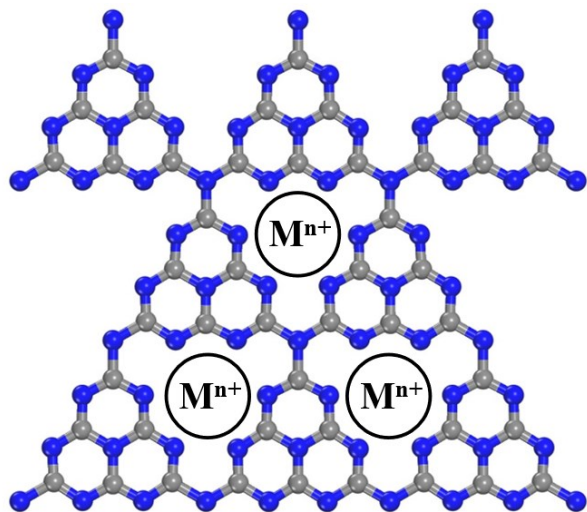

**Fig. S1.** Schematic illustration of the g-C<sub>3</sub>N<sub>4</sub> framework with the inclusion of metal ion ( $M^{n+}$ ) via an ion coordination route.

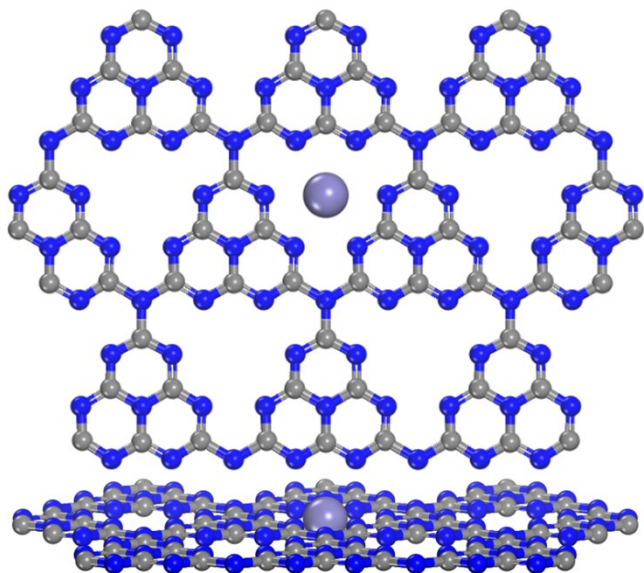

**Fig. S2.** Stable configurations of Fe<sup>3+</sup> ion and Fe atom in the nitrogen pore.

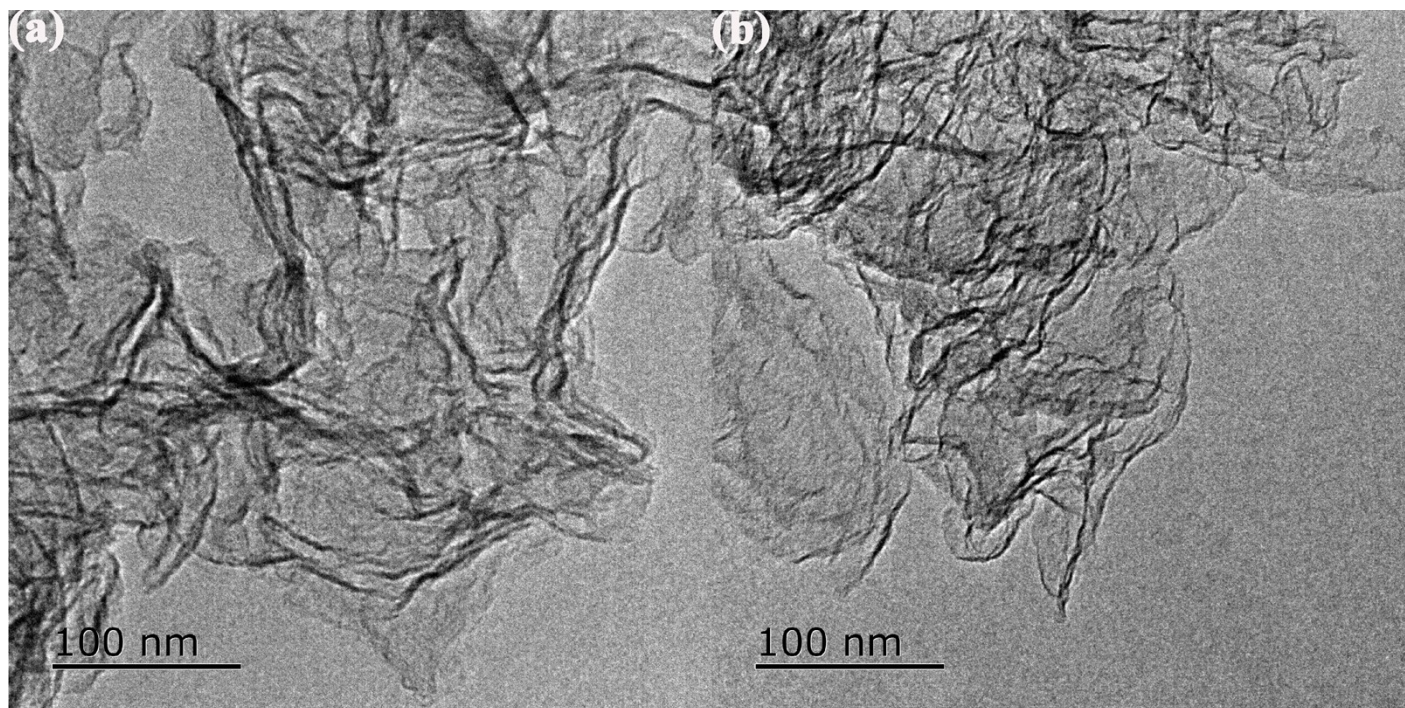

**Fig. S3.** TEM images of Fe/N/C-525 (a) and Fe/N/C-550 (b).

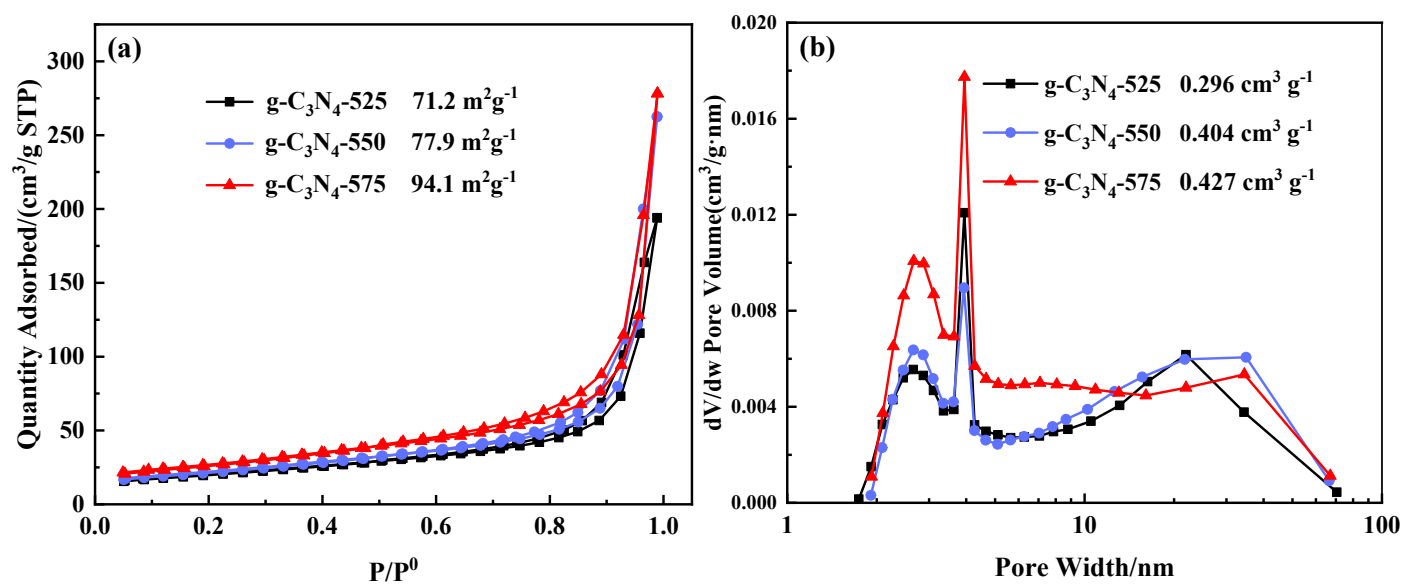

**Fig. S4.**  $N_2$  adsorption-desorption isotherms (a) and the corresponding pore distribution curves (b) of  $g-C_3N_4$  samples.

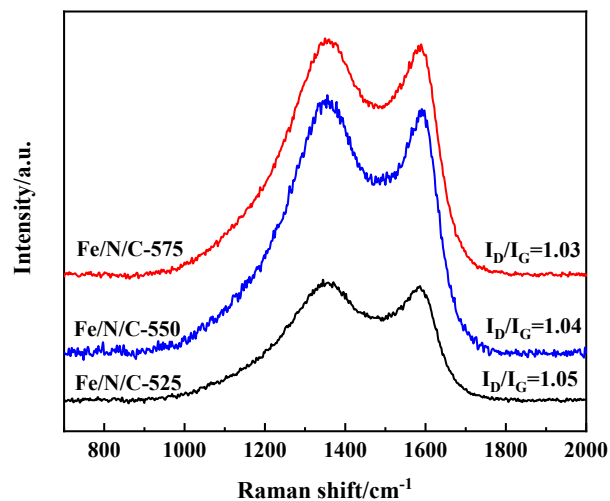

**Fig. S5.** Raman spectra of Fe/N/C samples.

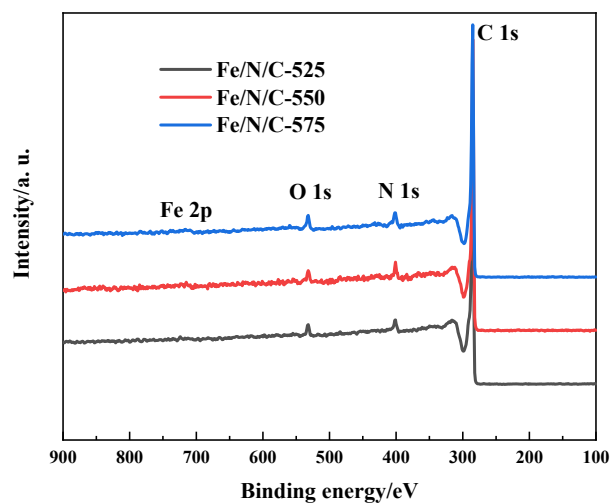

**Fig. S6.** XPS spectra of Fe/N/C samples.

**Table S1.** Compositions of Fe/N/C samples determined by XPS and ICP-MS.

| Sample     | C/at. % | O/at. % | Fe/at. % | N/at. % | Fe/wt. % * |
|------------|---------|---------|----------|---------|------------|
| Fe/N/C-525 | 94.61   | 2.00    | 0.29     | 3.61    | 1.23       |
| Fe/N/C-550 | 92.95   | 2.52    | 0.40     | 4.12    | 1.75       |
| Fe/N/C-575 | 92.88   | 2.50    | 0.34     | 4.28    | 1.50       |

\* Fe content determined by ICP-MS.

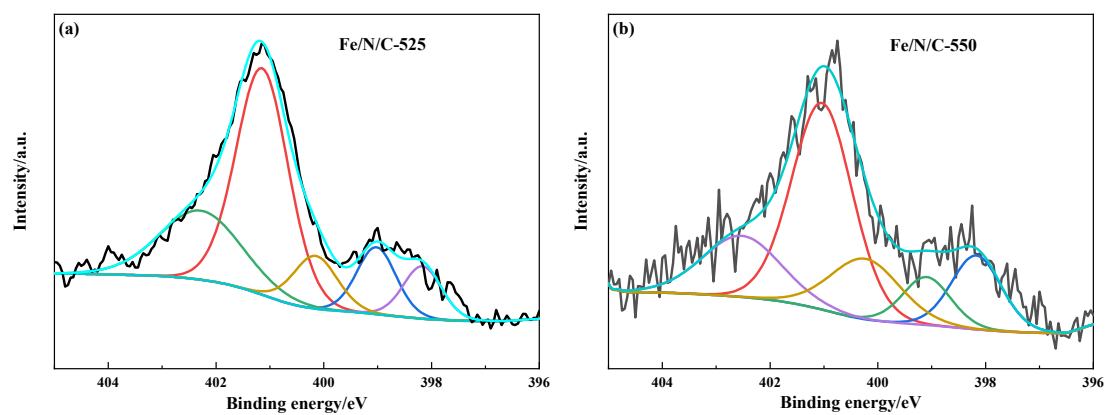

**Fig. S7.** High-resolution N1s spectra of Fe/N/C-525 and Fe/N/C-550.

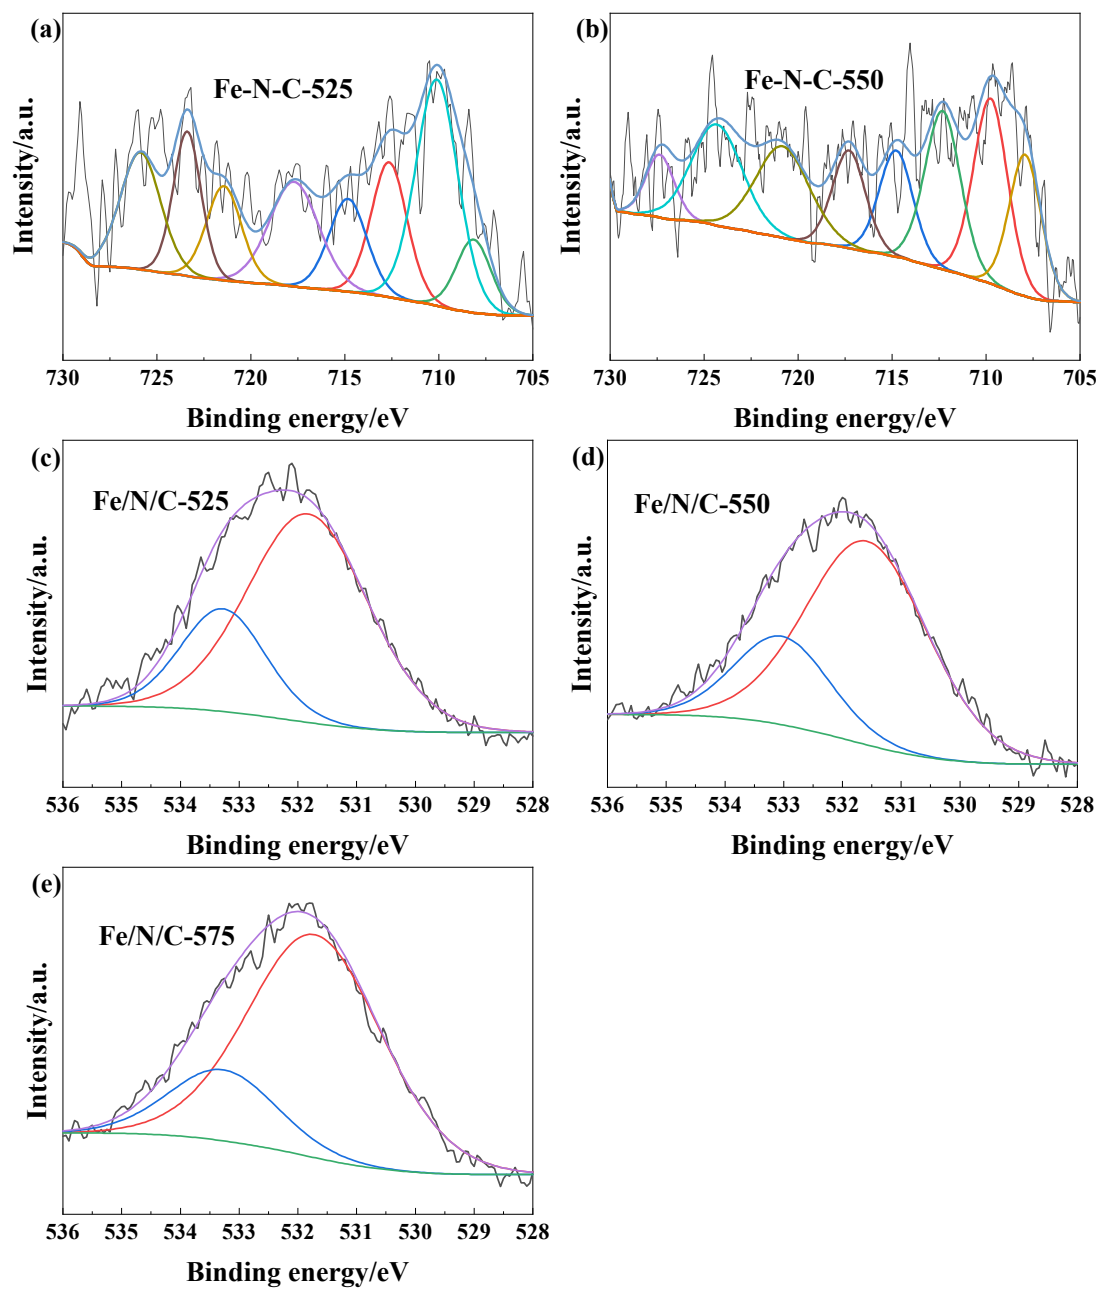

**Fig. S8.** Fe 2p spectra of Fe/N/C-525 (a) and Fe/N/C-550 (b), O 1s spectra of Fe/N/C-525 (c), Fe/N/C-550 (d), and Fe/N/C-575 (e).

**Table S2.** ORR activity of Fe/N/C and Pt/C catalysts.

| Sample       | $E_{\text{onset}}/\text{V}$ | $E_{1/2}/\text{V}$ | $j_k/\text{mA cm}^{-2}@0.9 \text{ V}$ | $j_m/\text{mA mg}^{-1}@0.9 \text{ V}$ |
|--------------|-----------------------------|--------------------|---------------------------------------|---------------------------------------|
| Fe/N/C-525   | 0.938                       | 0.851              | 0.768                                 | 1.935                                 |
| Fe/N/C-550   | 0.962                       | 0.868              | 1.692                                 | 4.262                                 |
| Fe/N/C-575   | 0.966                       | 0.882              | 2.481                                 | 6.246                                 |
| Pt/C         | 0.956                       | 0.851              | 1.237                                 | 9.371                                 |
| Fe/N/C-575-A | 0.972                       | 0.890              | 3.614                                 | 9.103                                 |

$j_m$ =mass specific activity

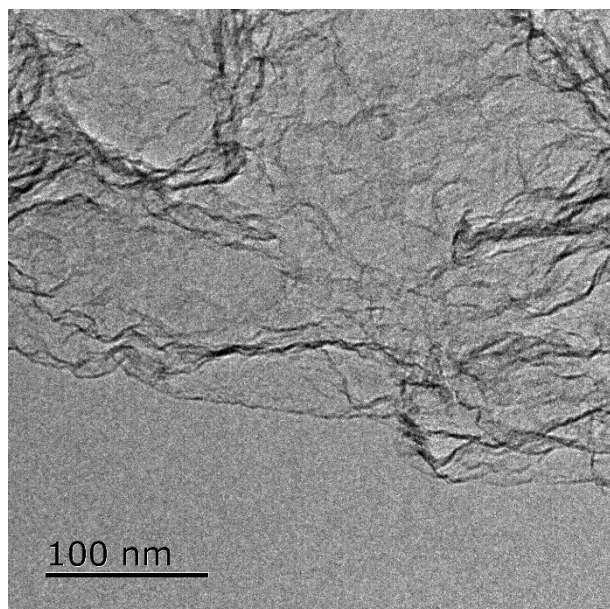

**Fig. S9.** TEM image of Fe/N/C-575-A sample.

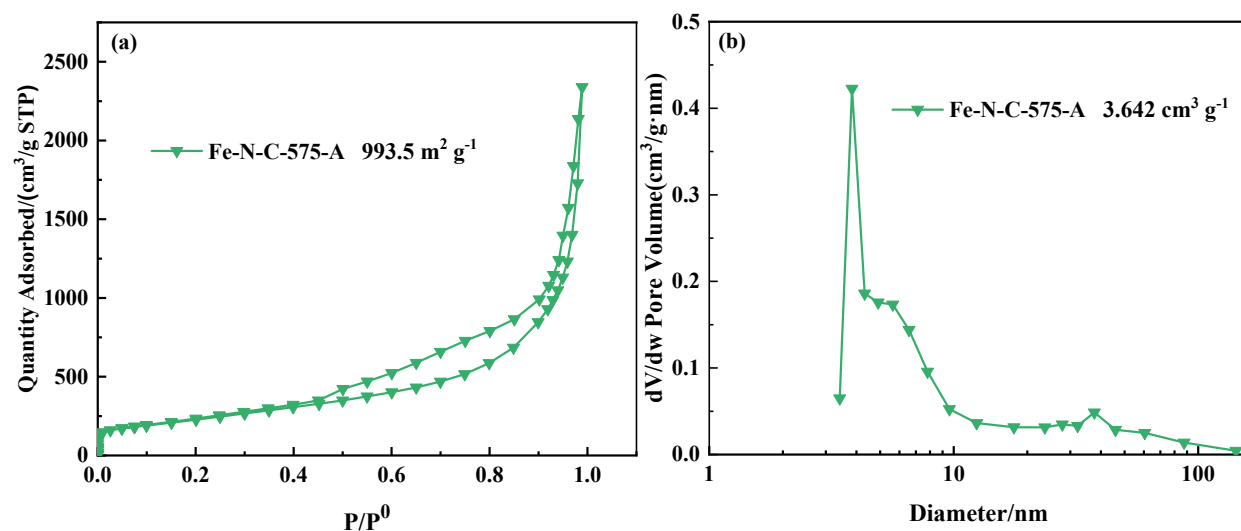

**Fig. S10.**  $N_2$  adsorption-desorption isotherm (a) and the corresponding pore distribution curve (b) of Fe/N/C-575-A sample.

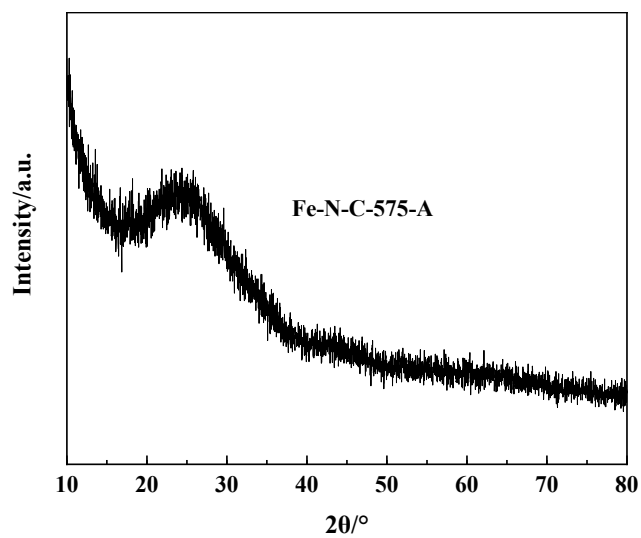

**Fig. S11.** XRD pattern of Fe/N/C-575-A sample.

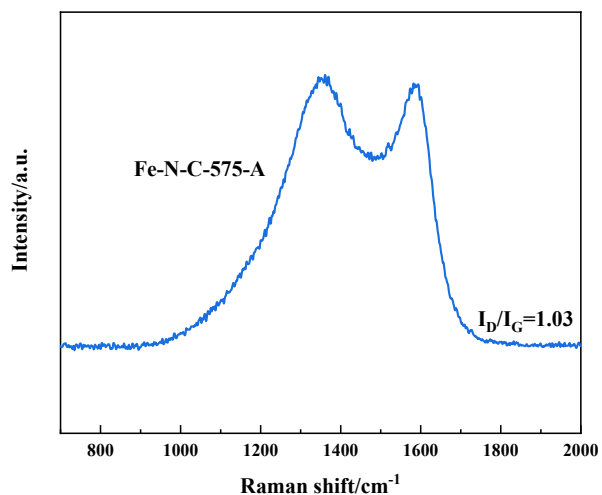

**Fig. S12.** Raman spectrum of Fe/N/C-575-A sample.

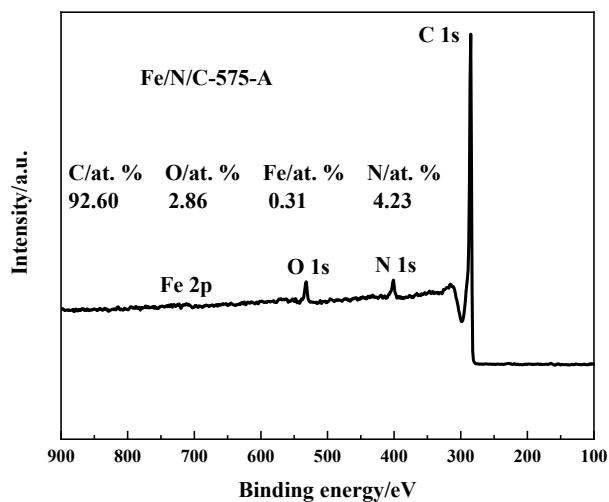

**Fig. S13.** XPS spectrum of Fe/N/C-575-A sample.

The associated mechanism of ORR in alkaline environment was as follows <sup>4, 5</sup>,

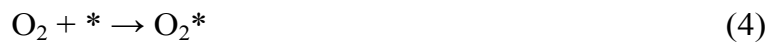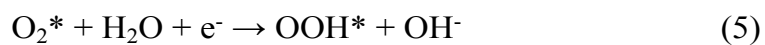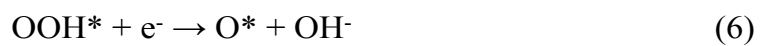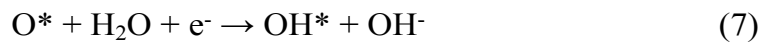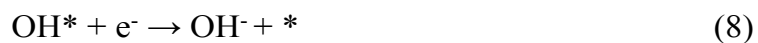

where \* denoted the active site in catalyst.

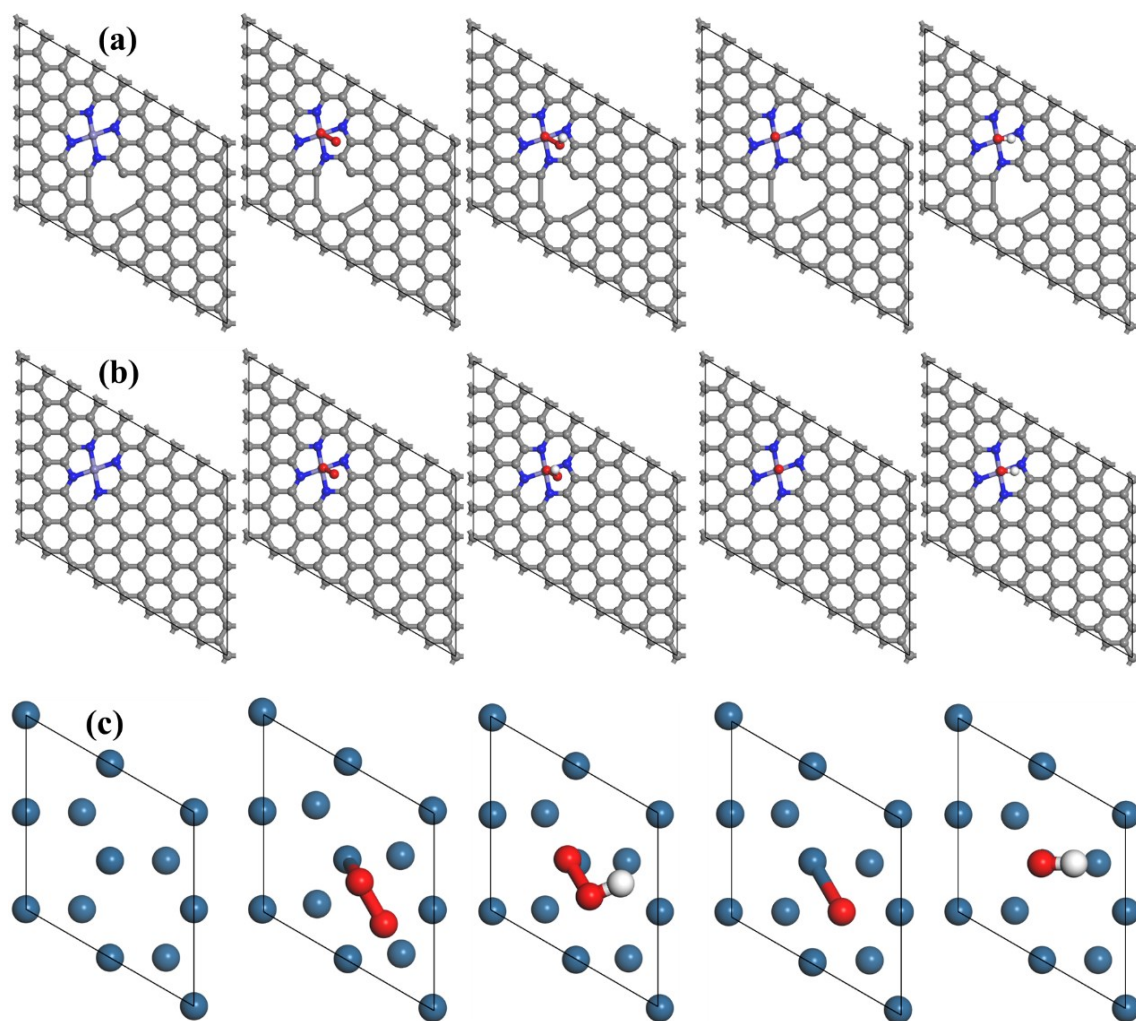

**Fig. S14.** Stable configurations of four oxygen-containing species  $O_2$ ,  $OOH$ ,  $O$  and  $OH$  adsorbed on  $Fe-N_4$  with (a) and without (b) adjacent pore and on  $Pt(111)$  (c) (the gray, blue, purple, red and white balls represent C, N, Fe, O and H atoms, respectively).

**Table S3.** Comparison of ORR performance of non-precious catalyst.

| Catalyst                                    | $E_{\text{onset}}$ [V] | $E_{1/2}$ [V] | Reference |
|---------------------------------------------|------------------------|---------------|-----------|
| Fe/N/C-575-A                                | 1.032                  | 0.908         | This work |
| FeN <sub>x</sub> -embedded PNC              | 0.997                  | 0.86          | 6         |
| Fe-NC SAC                                   | 0.98                   | 0.90          | 7         |
| FeNC-1                                      | /                      | 0.90          | 8         |
| Fe-ISA/SNC                                  | /                      | 0.896         | 9         |
| Co/Co-N-C                                   | 0.97                   | 0.85          | 10        |
| Cu@Fe-N-C                                   | 1.01                   | 0.892         | 11        |
| Fe-N-C HNSs                                 | 1.045                  | 0.87          | 12        |
| Co-N-C/CoO <sub>x</sub> -800                | 0.89                   | 0.82          | 13        |
| Cu-Fe-N-C                                   | 0.967                  | 0.864         | 14        |
| Zn/CoN-C                                    | 1.004                  | 0.861         | 15        |
| Fe/Fe <sub>5</sub> C <sub>2</sub> @N-C-1000 | /                      | 0.85          | 16        |
| SA-Fe-HPC                                   | /                      | 0.89          | 17        |
| FeSAs/PTF-600                               | 1.01                   | 0.87          | 18        |
| CoN <sub>4</sub> /NG                        | 0.98                   | 0.87          | 19        |
| 1100-CNS                                    | 0.99                   | 0.85          | 20        |
| N-Fe/CNs-700-800-NH <sub>3</sub>            | 0.930                  | 0.859         | 21        |
| S, N-Fe/N/C-CNT                             | /                      | 0.85          | 22        |
| FeBNC                                       | 0.968                  | 0.838         | 23        |
| SA-Fe/NG                                    | /                      | 0.88          | 24        |
| 3D MPC                                      | /                      | 0.88          | 25        |

The methanol crossover effect on the catalytic performance of catalyst was examined by chronoamperometric test, which was carried out in O<sub>2</sub>-saturated 0.1 M KOH solution at 0.625 V vs. RHE and 1600 rpm.

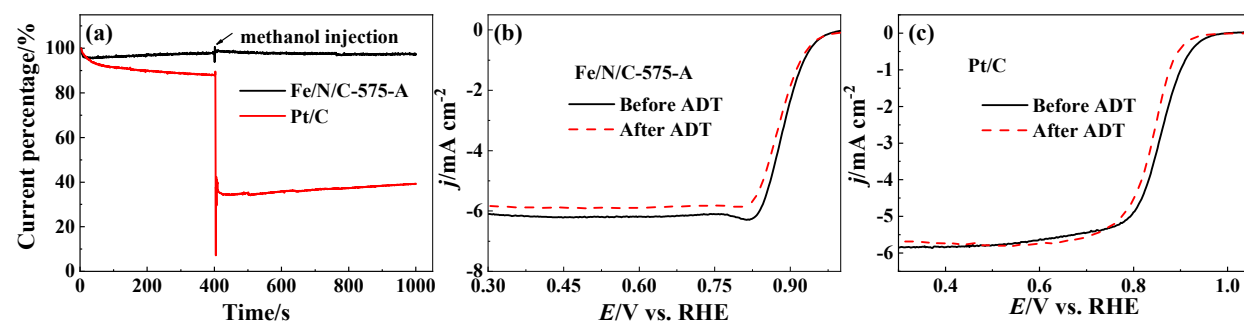

**Fig. S15.** Chronoamperometric responses of Fe/N/C-575-A and Pt/C catalysts (a), LSV curves of Fe/N/C-575-A (b) and Pt/C (c) before and after ADT.

## References

1. H. Zhao, C.-C. Weng, J.-T. Ren, L. Ge, Y.-P. Liu and Z.-Y. Yuan, *Chinese J. Catal.*, 2020, **41**, 259-267.

2. J. K. Nørskov, J. Rossmeisl, A. Logadottir, L. Lindqvist, J. R. Kitchin, T. Bligaard and H. Jónsson, *J. Phys. Chem. B*, 2004, **108**, 17886-17892.
3. K. Liu, Z. Qiao, S. Hwang, Z. Liu, H. Zhang, D. Su, H. Xu, G. Wu and G. Wang, *Appl. Catal. B-Environ.*, 2019, **243**, 195-203.
4. F. Li, G.-F. Han, H.-J. Noh, S.-J. Kim, Y. Lu, H. Y. Jeong, Z. Fu and J.-B. Baek, *Energ. Environ. Sci.*, 2018, **11**, 2263-2269.
5. X. Xiong, Y. Li, Y. Jia, Y. Meng, K. Sun, L. Zheng, G. Zhang, Y. Li and X. Sun, *Nanoscale*, 2019, **11**, 15900-15906.
6. L. Ma, S. Chen, Z. Pei, Y. Huang, G. Liang, F. Mo, Q. Yang, J. Su, Y. Gao, J. A. Zapien and C. Zhi, *ACS Nano*, 2018, **12**, 1949-1958.
7. L. Zhao, Y. Zhang, L.-B. Huang, X.-Z. Liu, Q.-H. Zhang, C. He, Z.-Y. Wu, L.-J. Zhang, J. Wu, W. Yang, L. Gu, J.-S. Hu and L.-J. Wan, *Nat. Commun.*, 2019, **10**, 1278-1288.
8. W. Wang, M. Tang, Z. Zheng and S. Chen, *Adv. Energy Mater.*, 2019, **9**, 1803628.
9. Q. Li, W. Chen, H. Xiao, Y. Gong, Z. Li, L. Zheng, X. Zheng, W. Yan, W.-C. Cheong, R. Shen, N. Fu, L. Gu, Z. Zhuang, C. Chen, D. Wang, Q. Peng, J. Li and Y. Li, *Adv. Mater.*, 2018, **30**, 1800588.
10. S. Wang, Q. He, C. Wang, H. Jiang, C. Wu, S. Chen, G. Zhang and L. Song, *Small*, 2018, **14**, 1800128.
11. Z. Wang, H. Jin, T. Meng, K. Liao, W. Meng, J. Yang, D. He, Y. Xiong and S. Mu, *Adv. Funct. Mater.*, 2018, **28**, 1802596.
12. Y. Chen, Z. Li, Y. Zhu, D. Sun, X. Liu, L. Xu and Y. Tang, *Adv. Mater.*, 2019, **31**, 1806312.
13. X. Guo, C. Qian, R. Shi, W. Zhang, F. Xu, S. Qian, J. Zhang, H. Yang, A. Yuan and T. Fan, *Small*, 2019, **15**, 1804855.
14. J. Li, J. Chen, H. Wan, J. Xiao, Y. Tang, M. Liu and H. Wang, *Appl. Catal. B-Environ.*, 2019, **242**, 209-217.
15. Z. Lu, B. Wang, Y. Hu, W. Liu, Y. Zhao, R. Yang, Z. Li, J. Luo, B. Chi, Z. Jiang, M. Li, S. Mu, S. Liao, J. Zhang and X. Sun, *Angew. Chem. Int. Ed.*, 2019, **131**, 2648-2652.
16. L. Song, T. Wang, L. Li, C. Wu and J. He, *Appl. Catal. B-Environ.*, 2019, **244**, 197-205.
17. Z. Zhang, J. Sun, F. Wang and L. Dai, *Angew. Chem. Int. Ed.*, 2018, **130**, 9176-9181.
18. J.-D. Yi, R. Xu, Q. Wu, T. Zhang, K.-T. Zang, J. Luo, Y.-L. Liang, Y.-B. Huang and R. Cao, *ACS Energy Lett.*, 2018, **3**, 883-889.
19. L. Yang, L. Shi, D. Wang, Y. Lv and D. Cao, *Nano Energy*, 2018, **50**, 691-698.
20. Z. Pei, H. Li, Y. Huang, Q. Xue, Y. Huang, M. Zhu, Z. Wang and C. Zhi, *Energ. Environ. Sci.*, 2017, **10**, 742-749.
21. S. Li, C. Cheng, H.-W. Liang, X. Feng and A. Thomas, *Adv. Mater.*, 2017, **29**, 1700707.
22. P. Chen, T. Zhou, L. Xing, K. Xu, Y. Tong, H. Xie, L. Zhang, W. Yan, W. Chu, C. Wu and Y. Xie, *Angew. Chem. Int. Ed.*, 2017, **56**, 610-614.
23. K. Yuan, S. Sfaelou, M. Qiu, D. Lützenkirchen-Hecht, X. Zhuang, Y. Chen, C. Yuan, X. Feng and U. Scherf, *ACS Energy Lett.*, 2018, **3**, 252-260.
24. L. Yang, D. Cheng, H. Xu, X. Zeng, X. Wan, J. Shui, Z. Xiang and D. Cao, *Proc. Natl. Acad. Sci. USA*, 2018, **115**, 6626-6631.
25. W. Wang, W. Chen, P. Miao, J. Luo, Z. Wei and S. Chen, *ACS Catal.*, 2017, **7**, 6144-6149.
